# Supplementary material for: Design of New Genome- and Gene-Sourced Primers and Identification of QTL for Seed Oil Content in a Specially High-Oil Brassica napus Cultivar
Source: PLoS One. 2012 Oct 12;7(10):e47037. doi: 10.1371/journal.pone.0047037 (PMC3470593; doi:10.1371/journal.pone.0047037)
Supplement: Table S2 — Details for 298 newly developed genome-sourced markers in DH genetic linkage map. (XLS) [file pone.0047037.s002.xls]

## Sheet: Table S2
Table S2. Details for 298 newly developed genome-sourced markers in DH genetic linkage map.
Markera	Chromosomeb	Positionc	Forward primer	Reverse primer
BrSF8-373a	A1	11.239	GAGGAGCTGCAACCATTAGC	AAGCCACGTGAAGAAAGTCC
BrBAC105b	A1	14.462	AGAATAAACGCGGTCACCAG	CCCTCGGTTGTAGTGGATTG
BrBAC105a	A1	18.959	AGAATAAACGCGGTCACCAG	CCCTCGGTTGTAGTGGATTG
BrSF5-16	A1	29.813	ACGTGCGAAGGAGAAAGAAG	GAAAACGGTGAATTAGGGCA
BrBAC006	A1	54.574	CATCGCTAATCAGAAAATTAGTGAAA	CGTTGGTAAGATGGGCTAACA
SF4923	A1	55.456	CTGCAACCGATTTGGAGTTT	CGATCTGATTGATGTGTGGC
BrBAC005	A1	55.565	AGATCTTGATCCACGCAACC	AAACGACAAATACATATGACAGTTTTA
SF20705	A1	55.738	AGGCACACTTGTCCTTCGTT	GATGTGGTGGAGGAGCTGAT
BrBAC003	A1	57.693	TGATTTATCATGCATTCTTTGTTTT	CGGCGCTTAGACGATAAACT
BrSF162-9	A1	64.401	GCTCAGCAGTCAGCAATCAA	GAGACCGTGTGTCCTCTCGT
BrSF28-12b	A1	69.349	AAACCATAATTTAAGTTGGTGTTTTTA	TCTTTTGCATTCATTTTTCTCAA
SF17181	A1	88.371	CGCCTAGCCTCTCAAGTCAC	TTCAGAGACCTTGGATTCGG
BrSF639-2	A1	100.436	CCCTGATTTCTTGGGTGCTA	GCCTTACGCTTGTGATCCAT
BrSF49-22	A1	111.915	CGTCACACGCCACATTATTC	AGTAATCAATCACCTGCGGC
BrSF49-32	A1	128.255	AAAAGGAAGGGCAAAGTGGT	TTTTGCCATTCGTGTCGTAA
BrSF49-89	A1	133.283	TTGCCAAATTTACTGCCACA	TTCTAGGTTGCATTGCAGGTT
snap0632	A1	135.342	GTTGAACATGATACACTCCATACTGGCATCTTC	TCTGTAGCAGTGGATAAAGATAAAGGAAGCCAA
snap0631	A1	136.185	GAACATGATACACTCCATACTGGCATCAGC	TTCCAAAAGGGAAACGTGAAGAAGAAGTATGT
SF7521	A1	151.452	GTTGCGATACGGAAGGAAAA	CAGAGTCCGTTCCCCTATGA
SF2258	A2	0.5	TCCCCTTTTCTTTCTTGGCT	ATGCTGAAACTCTCCCCCTT
BrSF25-146	A2	16.1	TTGACGGTTTACCGGATTTC	GAGCACCATTGCCAATTTTT
BoSF0926	A2	22.955	TTCCAACAAACTCATGCCAG	AACAAAAGGGATGACGTTGC
BrSF36-68	A2	27.749	CCAAACTGGACGTGATCAGA	GCTCCCATCGTTTCATCTTC
BrSF36-16	A2	28.608	TGCTAATGCTCCCGTATTCA	CGGTTTTCCTCTCTTCTCGTC
BrSF36-9	A2	31.467	TGGTAAACAAATCATGCAATCA	CGTATGAGTAGCAAGTGTCAACAA
snap1263	A2	38.823	CGGTTGTGTGGTTTCTTCTAGTATGGAGGA	ATGTTGCTTGGGTTGCCTTCTATTGGAT
BrSF18-108	A2	77.816	CCGAGTAGTGATGCACCAAA	AGCAAGAAGAGGCTCACCAA
BrBAC064	A2	81.378	GCCGTTGATTTCTTGTCGAT	CCAAAATCTAAGATCAGGCCC
BoSF1367	A2	83.199	GCTGCACATTTTGGGTTTCT	CAGCAATCGCAAAGGAAACT
pr41	A2	83.633	TCACGAATTTCAAAAGAGCCT	TCAAAGGTCTAACAGGTTGGC
pr25	A2	83.71	TCACGAATTTCAAAAGAGCCT	TCAAAGGTCTAACAGGTTGGC
SF9470	A2	84.298	CTCGAGAAAATTCGAATGGC	GTTCCCTCTTTCTCTCCGCT
BrSF18-238	A2	86.798	AAACACACTTTGGTTTGCACC	AAGCGACTCTCCGCTAGAGAT
SF22180	A2	86.987	TCCCTCAACATACCCATTGA	TGTCCATGACCATTGCTTGT
pr27	A2	100.054	CTGGACAGTTTTGTTTTCTCG	GTCTGGGGGAGGAATGCT
BoSF1445	A2	127.33	AGCGAGCTGAGTTTGAATCC	TCATAACAAGGTGAGCAAGGC
BrSF34-118	A2	137.731	CAGGACAACTATCTAAGGTTTGTTCA	TGTCCAGCGCTTAGACTCAA
BoSF0970	A2	138.175	GCCAGAGTAAATCTCGTCGC	CCTAGAAGCATCTTCACGGC
P597	A2	139.9	CGACAGAGGGTTCAAATGGT	CGGTGTGTAGGTCTGCTCAA
BrSF34-123	A2	140.561	CCCCTGCAATTTGTAACCAC	CCCTTTTGAACAAGGTACGC
BrBAC292	A2	141.865	TGAAAAAGAAGAAGAAAACATCACA	TAGTCAAGGGGTGGATCGAG
BoSF1574	A2	148.188	CCTTCCACATGCTCCTTCTC	GGTTTAGGCTTCTGCTGCAC
ns093	A3	0	GAAGCGAGTCGACGCGGAGC	CATGAGCATATTACAGTGCTAGAGCGTTCCTAAC
BrBAC103	A3	6.451	GCTTCTCCACAAAAGAGACGA	AATCGGATTTCTTTTGGCACT
SF32448	A3	9.943	TTGCCGGCTATGATCTCTCT	AAAAGGGCTGTTCATGATGG
SF36824	A3	12.786	TGACCAATCCCTTATTGTGGA	TGTTTTGATTAGCTTGTCGATTG
SF1118	A3	14.299	CGGATTGATCATCACCACAG	CTCATTTCACGCCTTCTTCC
SF22767	A3	21.372	AACTTTCCGCAAATGTTGGA	TGGCCAAACTCGTAAGAATG
BrSF166-9	A3	22.028	TGACATTCGCATCAGATTTGT	TTCCTCCATCGTCTTTGTCC
BrSF345-6b	A3	28.381	TCTTCCCGCCTCTGAGTAAA	CGGAGTTCCAAAGACCTTCA
SF967a	A3	28.938	TGGAAATAGGCATATTACATTGG	GAAGAGCAGGAAGTTTTGGC
SF49160	A3	30.128	TTCTCTGCGTTTTCAGGTGAT	CCTAAGAGCCGTGACATGGT
BrSF41-62	A3	32.879	GGTTAAGGGAACAAGCCCTC	CTAGAAGCGAGGCCATGAAT
BrBAC078	A3	38.82	TTTCACATGTTTTCTTGGTCATC	CAGCGAAGAACGGAGAAGAG
BrSF39-104	A3	41.732	GATTTCTCAGAGCCGAGCTG	CTCTAACGTCTAGGGGCACG
SF6922	A3	81.077	TCCAGAGCAGCGTATAGCAA	CCAAAAACACGGAGAAAGGA
SF2407	A3	83.786	TGGTAAATGTCTCGGCTTCC	CGCAGGCTTCTGTATGTGAA
BrBAC084	A3	115.523	CAACCTCAAACCAAGGAAGA	TCGATGATTAGTTTAGTTATTTCACG
P563	A3	119.745	TCGATGATTAGTTTAGTTATTTCACG	CCTCAAACCAAGGAAGATTTCA
SF42043	A3	129.111	GTATGAAGGACAACGCGACA	TTAGCAGACTTTAGCGCCGT
BrSF68-39	A3	155.657	CACCAGAGAGAACGCAATCA	TGCTCCTGATGCATTAACCA
BrBAC098	A3	182.523	TTTAGACATGCAGCGTGGAG	TTTCAACGGCTGTTGCTGTA
BrSF8-355	A4	0	ACGACATTGCCCCACATAAT	CACGAAGAGTCTCCTCCGAC
BrBAC125a	A4	14.67	GGCAATAGGGACATTTGGAA	GAAGATTCGAGCTCTTTCGG
BrSF3-126	A4	22.261	CCCCTGGACTCCGTTTATCT	TCAGGCCTCCAAACAAATTC
SF50471	A4	30.23	GTTTGTCAGGGAACATGGCT	CTGCCACGTATTCGTCAAGA
SF5811	A4	33.207	TGGGGATTCGATTCTTCAGT	TTAATGTTTTTCCCCGACGA
snap2083	A4	36.657	AATATTTGATTTTTGTTCTACTTTTGAGTCGCTACT	TGATGTTCACATAAGGGAAACTCTGAGCAGTAAT
BrSF198-2	A4	58.011	AATGGCGACGATTCTGTTTC	TCATTATTTTGGATAATTTAGACCCTT
BrSF32-93	A4	63.923	GGAATTGGTCAATACGCTCAA	CCAAATGTGTGAGCACCTGT
BrSF167-13	A4	74.637	CACTAAAGCCTAGATCCTCATTTT	GGGTTCATCATTTTCGTCCA
SF1869	A4	87.424	TAGAAATCAGAGCGAAGCCC	TTCATCAGGGATCTCCAAGG
BrSF24-24	A4	90.472	CGATTTGGTGTTCCCTCACT	GTTTCGTTGCCTCTCGTCTC
BrBAC125b	A5	2.097	GGCAATAGGGACATTTGGAA	GAAGATTCGAGCTCTTTCGG
BoSF1657	A5	40.769	TAAGAGATTTGAAGTTGGGA	GATAGTGTTGAAGCAGAGAAC
BrSF27-50	A5	46.973	GTCGAGAGATTCCCTGTTCG	AGGGAGAATGAGCAAAAGCA
BrSF176-13	A5	58.269	TTGGTTCAAATTATTTTTAATGGAAG	AAACCCCAGATTTTCATCATTTT
pr22	A5	60.527	CGCAGAAGCTTCCACGTT	GACAATACCCAATCCAACGG
BrSF16-225b	A5	67.966	TTCTGTCCAGCTGCAATCAC	AGCATCACTAGCTTCGCCAT
BrSF757	A5	78.22	CAAACAAATATCCAAAGAAACCG	CGTTTGGATTTGGGTTATATCAG
snap0260	A5	83.017	GTCTGCTGTTGGTTATGGTGATTGCTG	AAGGTTTCATCACGCGCTTTGATCAG
SF32967	A5	90.36	TTTGCCAATAAGGACCCAAG	TCGTTTTAACCGGAGGAGAA
BrSF9-211a	A5	93.246	GGTCCTTGGACTCCTGATGA	TCCTCCTCCGGAGAGAATTT
SF9176	A5	96.382	AGCCTGCATCCAATGTTTGT	AGGAGGAGGATGATCGGAGT
P536a	A5	97.27	GTGAGAGCTTGGATCGAAAA	GCTAGCTCATGAAAGAACCG
BrBAC138	A5	103.678	CGGTCCATTACATGAGACTGAG	CATCTCAAATCTGGCGAGAAC
SF12922	A5	111.105	CTTGGTCCGTTGCTCTTTTC	AACTGATCGAAAGCTCGCAT
BrSF107-27	A5	121.986	TTTTTGCCAACTTTGAAATGC	TTCATTGAACCTTCTTGCATC
BrBAC133	A5	135.214	GAAATCTCCTACACATATCACATTTCA	AACCTTCATTTCATATACATACACACA
BrSF163-9	A5	144.962	CTTGGCAGCTATGGTTGGAT	TCTCATGTTCTTCGTGCTGC
SF27225	A5	167.031	CCTACAGCAGTAACGGCTCC	AATGACAGGTCCCCTCCTCT
SF10748	A6	0	CCTTCTCATACCTCTCCCCC	CCGTGAACGTCATTGATCTG
BoSF1271	A6	31.78	GGATGGCAGCTTTTTGTGTT	AATTCTGATACGCAGGCACC
BrSF14-22	A6	35.876	TGCATTGCTTTCTTTTGCTG	ACATGCGAAATCTTGGTTCC
SF940	A6	39.53	TGGATTGGTACAGACGACGA	AAAGCCAAACAAAAAGCCTG
SF17359	A6	48.3	TTAGAGGCATAGGGGACGTG	ACGTTTGGAACACGTGTGAA
BrSF50-45b	A6	52.6	TACCAATGAGCCCTGGAATC	TGCCATGACTGCAAAGAGAC
BrSF50-42	A6	52.8	GGGCAGGCTAACCCCTAGTA	GAAGACGACGACATCGGTTTA
BrSF50-3	A6	62.329	GATGCGCTCACAATTCTTCA	CCTATTGACCCCACACCACT
BrSF201-1	A6	66.32	TGGTTTTCTCTTTTCATTTCTTTCTAT	TTTGAAAATGTTGAAAAAGAAGTTG
BrBAC170	A6	71.465	AAATCAGAACCGAATCCGAC	CAATGGTTGCAATGTTATTTGG
BrBAC154	A6	74.631	CGGGTGGACCTAAATAGCAT	AACTGCTTTGAAAGTTAATATTTGGA
BrSF47-15	A6	76.944	GCCAGAGCTAGAATGCTTCG	GAGAGATGGCAAACGGAAAG
SF6905	A6	77.674	GCGGAATAAGTTTGTTAGTGCTC	AGTTTTGGCCACCAAGTAAA
SF14115	A6	78.93	GAACAACTCCTGACGCACAA	GAAAGATGTCATTGCGCCTT
SF2588	A7	0	TCAGTTCGGAGTCTGTCCCT	CTTCATGGATGCAGGTGTTG
BrBAC192	A7	7.879	AACATTGGTCAACCATCTCTCTC	CCAAAAAGTGATCGTATACCCG
BrBAC129	A7	8.033	CAACATGGTTGGAAGTCCATT	CACCATGATCCCTCCTCACT
SF3855	A7	27.353	GAGAACCCTCGCAACAAATG	GGATCAATCATCCACGCTCT
BrSF1745-1	A7	40.884	AACTCAGTAAACCCCAAAAATAAA	TTTCCTATGCTCATGCAAAGA
BrBAC182	A7	51.354	AACATTGGTCAACCATCTCTCTC	CCAAAAAGTGATCGTATACCCG
BrBAC181	A7	52.5	CCTTGCTTCTCCCAGATTCA	TCAAAATTCTGAGGGAGGGA
BrSF13-163	A7	59.637	TTCAAAGGATAAGGGCATCG	ATTGCACGCATCCACATAAA
SF29198	A7	69.503	GAGCATCATTAACGCGGTCT	CTTCATTTGCTGGGGATCAT
SF48488	A8	14.925	GCGGGATGAGAAAAGTTCAA	CTCTTCTTCCTCCACATCGC
BrBAC210	A8	23.056	TCAAGCTTCAGCCCTTAAAAA	TGCCTTCATAAACACGCAAA
SF56094	A8	35.938	GAGGCGATTCGTCGTTCTAA	ATTGGCCATTTCAGTGAGGT
BrSF28-142	A8	44.328	TTCTCTCCTCCTAGTCGCCA	CGCTCTCCATTTCAGCTTTC
snap0459	A8	63.402	GTCGGAGAGTTTTCGCCTGCGTA	CAAACGCTTCTTTCCGCAGCGTTA
BrSF15-19	A8	80.947	AGGCCCTCTCTGTCCATTCT	CCTCCGGTGTCCATAACAAC
BrSF36-58	A8	83.944	TCCTGAATACAACGAACCAGAA	TGGTGTGTCAATCACCACTTG
BrSF28-12a	A8	109.245	AAACCATAATTTAAGTTGGTGTTTTTA	TCTTTTGCATTCATTTTTCTCAA
BrSF25-129	A8	117.011	GGGAATTTTTCAGAATGCCTTA	TTGGATGAATGTGTGTGGAGA
BrSF43-57	A8	135.593	GCAAATCAAGCAAGGTTGAAG	TCAACTTTTTATGAATCCTTCTTTG
SF32915	A9	14.515	TCCTCAGCCACCAAGGTTAC	CGATGAAAAGCTTTAAACGGA
BrBAC261	A9	28.689	TGATGGGTCTGAATTGGGTT	TCCTCGTCGATATGGTGACA
BrSF1077-1	A9	42.276	CCGAGAACGTGTATAACGCA	TCATGCCGGACAACTATGAA
SF12680	A9	50.172	AGCAGGAACAGCTCGAACAT	CTGGTGTCCCAACTGTTGAA
BrBAC229	A9	57.996	AAAAACATAAAGACAACTTTGATGAC	GAGATTTTGACAAACGACTTGAAA
BrBAC277	A9	60.318	AAGTGGCGTCAATGTGTCAA	TCTACACAAAGCACAATGCCA
BrBAC248	A9	62.494	AAGTGGCGTCAATGTGTCAA	TCTACACAAAGCACAATGCCA
P534b	A9	64.891	TCGGGATCCTGAACAGTG	ATGCAGCAGAGTAGCGGA
BrSF7-174b	A9	66.558	TTGTGAAATCAAAGCAAAAAGG	GAATGAGTGGGTCGTTCGTT
snap0745	A9	77.298	TCTCTAGAGGTTTTAGGGAACTCATGTCTAAAGTCT	ATCACTGAATCCATATGCAAAGATGATATCGG
BrSF113-1	A9	84.509	TGCATCAAATGGGTTGTCTC	ATATTTTTGGTGGAAGGCCC
BrBAC256a	A9	93.004	ATCATTGCAACGGTAGCCTC	GCGGGTGTTAGTTTATCCGA
SF602	A9	107.691	GAGCAATGAGCGAGGCTAGT	AGCTGAAACAGATCAGAAGCG
BrSF243-2a	A9	108.766	GTGATTGGTTGGCACATGAC	GTGATGGTACGGCTTAGGCT
P530a	A9	113.901	TGCACTAAAATAGCTGCAAAGA	GGTTTACAAGACGTCGAAGAAG
SF23242	A9	125.158	TCAGCTGCCTCCTTTTGTTT	AGCCTCCAGAAGCATCACTT
BrBAC275	A9	126.88	CAGATGGGGCCAAGTTACAT	CATTCTTCACCAACACACCG
BrBAC281	A9	127.18	CAGATGGGGCCAAGTTACAT	CATTCTTCACCAACACACCG
BrSF21-186	A10	5.004	GCGATCAGATCCAAACGAAT	AAGACGATCTCTTTCGCTGC
BrSF21-207	A10	5.692	GAAGCCTGGTCCGAGAATAA	GCCACTCATCATTCCCTCAT
BrSF9-249	A10	20.779	TGACAACTTTGCGAAAGGAA	CTTACTTGACGTGGGCCTGT
BrSF10-83	A10	32.699	GAAGAGGACATGAGGTGGGA	TCTCTTCGGAAACCTCATCG
BrBAC287	A10	32.913	TGACAAACTTGTAGATAATTTCCAGTG	GAGATTATAACTTTTCCAATGTGTGC
BrSF10-112	A10	34.569	TCGAGATCCCTCCATTTCTG	GTCTTCATCAGGCACTGCAA
SF4220	A10	44.73	AAAACCCCACTTTTGACGTG	CCGTCGTTATCATCCTCGAT
SF45406	A10	58.773	TGGTTGATGCTTCAGACGTG	TGCAAGCAGTGAAATGGAAG
SF12251	C1	0	TGGATTGTCAACGCTCTCTG	GGGGTTTTGGTAAGTGGGAT
SF29555	C1	13.885	TCGTTGGTCTTGCCTTTCTT	CGTATTTCTTGAGTGCAAACG
BrSF26-86	C1	17.821	TTTGAAACATGCCCATCTCA	GCAGGCTACCATCAAAGCTC
SF2518	C1	29.658	TCACCACCGTATGTCACTCC	CCTCCTCGCTTGCCTATTTA
SF25617	C1	42.742	ACGTAACAATTTTCTGCCGC	CATGCAAACACATCAAAGGG
BrBAC015	C1	48.388	AAGGAGAGCTGAGACGTTGC	CCGACGGTCAATATTCCATC
SF14164	C1	57.176	AAATCCAAACCCACAACCAA	CCCATCACAGAGGCAAGAGT
BrSF12-118	C1	59.592	AACTCGGGCAAGAAAGTGTG	TCAACCAAACCGATGTGAAA
SF1421	C1	63.195	CGTTTCGAGTGTCTCACCAA	TCGAGGCTAGGTTTTGCAGT
snap0256	C1	71.484	CCGGACGACGACGTATTAACGGTAAGTC	ATGTGGATCGACAAATTTGCAAGGAAAGT
snap0201	C1	76.964	CGAGTCCTCAAGCAACTATGAAAGAAGGAC	CACATCAATTTCCAAGGTGTGTTGCTTTC
BoSF1270	C1	85.862	GCATTGATTGGATGATTCAAAA	ACTGATCTCCTCACCCGTTG
BoSF1147	C1	89.578	CCCCATCGTGTTTACGATTC	GCGTGGGTTCAATTACCACT
BoSF1207	C1	93.533	CGACGCTAGACCAAGGTTTC	GGAAAACCTTCTGCCAATGA
BrBAC019	C1	113.33	GACTTTTGTCCCTTTCCCAA	TAAGCACAAACCACACCCAA
SF7889	C2	7.066	GCTGGGGAGAGAGAGAGGAG	TAGGAGTGTGGCCCACTAGG
snap1974	C2	15.087	CGTTGTAGTCCAATCAGGCCGGG	ATATATATCGGATGAATTCGTGTTCACGTGGTT
snap1975	C2	17.547	GGCTGTAATTTCACATGGCTTTTAGGTCAG	AGATTCGAAGGACACCTAAAGTCTAAAATGAATTTG
SF22862	C2	18.002	ACCCACACAACAAAAGCCTC	TTTGCAAAAGCCCATGTGA
SF20027	C2	18.034	GCAAGATAAAACAAGCATTGTGA	GACAGCTTCTGCAGTACCCC
BoSF1554	C2	18.145	TCAGGGGGATTTATGAGCAG	CATATCTTGGATTTTTGGCCC
SF4961	C2	18.3	ATATTCCGGTCTGGTTTCCC	TCGCTTGAAGTTGATAGGTTTG
SF12754	C2	18.343	AGGTTTCTGAATTGGTTGCG	GCGCCTGTGCTAAGAGAATC
SF5524	C2	18.583	CAAAAGGCAAAGACCGAGAG	CCACTGACCTTGGATGTGTG
SF43712	C2	20.183	TTGACCAAGCACTCATCTTGA	GCTCTGCCCGTTGAGAAATA
SF25947	C2	24.045	TTACTCCAGTGGACCCCTCA	ATGGCTATTCCAGGCCTCTT
snap2026	C2	34.868	CAGCAAGATGCAAGCTTTGAATCTGATG	TAACTGAGCTTGACATCACAGAATGCGG
BrSF34-24	C2	51.416	TGATGTTGTGCTGAAACTTGG	GCTACTTAGATTATAACCAGCGGC
BoSF1656	C2	56.02	ATGAACAGCAACAACAACAA	TGTCTTCTCAAGTCCAGCA
SF10463	C2	61.87	CCCTATTTGCGTGCGTCTAT	GAAACCACCCATCAAGGAAA
BoSF1157	C2	65.24	TTCCGTTTCGATTTGGTTTC	TCTCTGCTGCTGCGAACTTA
SF6828	C2	69.439	TTTGGTAAGCTGCTAAGCTCG	CAAAGAACTGGGTCTGCCTC
SF967b	C2	80.079	TGGAAATAGGCATATTACATTGG	GAAGAGCAGGAAGTTTTGGC
BoSF1020	C2	90.684	GGCTTATCGTCTTGTATCCCA	GCAAGATAACGAAGTGACGC
SF2874	C3	4.03	TCGATTTGAACGGAATGGAT	GGCCTAATGGGCTTCACATA
snap0529	C3	6.744	CCGGAGCTCATCTCCTCTCGCA	CTGGAGAAGAAGGAGGAGACCGCTCTT
BoSF1594	C3	21.59	CTGTTATCCGATTTTGCGGT	CCTCCTCGGTTGTTGTTGTT
SF84098	C3	25.806	TCAGGATTAGGTTTGCTAATAATGT	AAGGAAACTCTATTTCATTTTCTTTG
SF6648	C3	47.289	TTCTTTCGTCTCTTTGGCCT	TACTTCTCCGAGCCACATCC
BrSF5-382	C3	50.535	AGTCATGATAATGGGCCGAG	CTGCAAAGAAGGAGAATCGG
SF2218	C3	51.642	GCCTCATCACCACAGTTCATT	GGGTGGATTTTGTGAAGGTG
SF44695	C3	60.445	AACATCCGTGGCTGAATCTC	TGATCATATTCATATCTCCCCAAA
SF11085	C3	70.58	TCAAGAGGGTAATCAACGGC	GGTTCTTCCACTCCTCCTCC
BoSF1195	C3	72.981	ACCAACGGCATCGTATTAGC	TTTCTCTCTCTCTAGCCGCC
snap0719	C3	86.583	GAGTCATTACTTGCCAAACAAGCATGAAGC	ACGTCTCTAATTCTCTGTATGTCCCAGCCAC
snap0720	C3	88.348	GAGCAACTAAAGAGGTAGGGTTTGACCAACTG	TATTAAAGAAAAACTCCAGGGAAGGCTGCA
SF10921	C3	93.377	CGAGTTCAGACATTGAAACCAA	GCAGAAACTGCTTCCTTGCT
snap1677	C3	97.047	AAAGTTAAAGGAGGCCGGTCCAAGAAAATTATA	TTGAATTTCTGAGAAGAGGTGCAAGAAACG
snap0204	C3	98.718	ACACCACGTCCCTGCAGAAAAACTCT	CTTCCTAAAACAACAATGATTCCTGAACCAGATAA
snap0202	C3	100.249	CGAGCGTAGTGGTATGGTCCGTGAGAC	AGACAATCAGCCGGAATTTCTGTTAAACTACACT
snap0532	C3	111.183	GCCGCCTTCAAAGACACCTTTTCTG	ATTGAACAGATTCCGCTATTTTTAAGACCAACATTA
snap0833	C3	114.408	AACCATTTTTCGTATATAGATCCGTGTGCTGTC	TTGAAGTTTCCAGCAGTTTCATCACATGTTT
SF12806	C3	118.198	CATTGTACATGACCGCCAAC	TGCGTGCTCTTTTGATATGC
SF12388	C4	0	ATCCCAATCATCTGAACCCA	GTCGTAGCAAGTGGTCAGCA
SF55516	C4	6.74	ACCACCGATGATCTTTACGC	TGGATAAACATTTGGATTTTGA
ns069	C4	16.416	TCAAAGACTGAAGGCCATGGCGA	AAGCATCTTACCTTTGACGAGGAAATTGTAGAGTT
BrSF8-373b	C4	36.251	GAGGAGCTGCAACCATTAGC	AAGCCACGTGAAGAAAGTCC
BoSF1185	C4	83.799	CAGCTTGTTGGGTCTGTGAA	TGGTGCTGTGAATTCCTTGA
BoSF1143	C4	86.072	ATGGATCGCTTTGAGCAGTT	TTTTCTAAGCGACTGTGCCA
SF41944	C5	21.826	GGGAATGGGAGAAGAGAAGG	TCAATTTTGACTTCGAGCCC
SF6720	C5	23.537	TTCAATCGCCATTGTTCAAA	TTGGGAGGATAAGAACGACG
BoSF1196	C5	27.703	TCAGTGTTGACCGTATCGCT	CTGGGGAGATTCAATGGAGA
SF16773	C5	33.555	AAACGCCCAAGGCTTCTTAC	CGGTGTTGTGAAATGGTGTC
BrSF44-29	C5	39.82	TCGCTGTGTTCCTCTCTCCT	CCAAAGTGTCGCACTGAAGA
BrSF44-55	C5	44.86	GCGCGTCAGAAACTCTCTCT	TGAATTTCAAATGGGGTCGT
SF36141a	C5	49.656	GGGGTTTGCAGCAATGTAGT	CGTCGTCCATGTCTAAGCCT
BoSF0935	C5	52.536	TGGCGATCGAGTTATGTGAA	GTCCGGTTATGTCTGTGCCT
BoSF1600	C5	54.154	CTGCCTTTTGGAATCTCTGC	TCATTGCCTCTCGAAAAACC
BrSF9-211b	C5	58.358	GGTCCTTGGACTCCTGATGA	TCCTCCTCCGGAGAGAATTT
snap0068	C5	61.599	CAGAATGTTGGAGGAAGGCTAACGAAAGA	GCCAATCCATCGGATTTGTAGTCATGTC
snap1200	C5	73.78	TTAACCTTTGTGGCAGATAAACAAACTGAGATAAT	TTATCACTCTCTGTGTATCCAGTGTGTGAGTGC
SF85984	C5	79.064	TGGCGTGATGTAAAGCTGAG	GCTCACCTCTCCTTTGTTGC
SF60279	C5	81.414	CACCAAACCGAGATCATGTG	TTGATGCTGTTATTGGAAGCC
BrSF180-10	C5	81.911	TTGATTCCGGACCAAAGTTC	CCAATCAAAATACAACATGCAAA
SF1947	C5	82.312	TTCCAAAGGAATCGGGATAG	TGACTCTGCTCCGGATTTTC
BrSF345-6a	C5	84.161	TCTTCCCGCCTCTGAGTAAA	CGGAGTTCCAAAGACCTTCA
SF18680	C5	90.161	GGTCTAGGCGAAGTTTAGGC	CGGTAACTCGGTCCTAACCA
BrSF392-2	C5	91.284	GTCAGCGGTGAGCTAAAAGG	ACATTCTTACCGCAAATGGG
P506	C5	102.291	GGGCCAAGTTACATGGAAAA	GAAGGAGGATGAGAGCCGTT
SF10487	C5	117.494	TCTGAGGAATCGAAATTGGG	GCGTACACTTGTCCGGTTGT
SF20031	C6	10.774	GCTTGAGGTAAGCTCATCGG	CGTCCATTGGGCTGTTAGTT
BrSF41-11	C6	16.266	AAAAATGAATGGGACAGCTCTA	CAAACCTCACAGATAGGCCA
BoSF1573	C6	27.126	CGCATTTCAATTGTTTCGTT	TTGTGTGCATTTTTATGCTGTTT
SF1044	C6	36.013	TGGATTCACCCATTTTTGGT	ACGACCAATCAAAACGAAGC
SF41195	C6	43.416	TCGAGCTTGATTTATGGCCT	CTGATGATGAGCACCGAAAA
BrSF233-1	C6	49.071	TTTGTCGCCTCATATGTCAAA	TTCTTTGAATAGCTAAATTAAGTGTCG
SF7679	C6	50.534	CCGGTTTTAGCAAACCGATA	TGATCTTCACTCGTGTTCCG
BrBAC290a	C6	54.781	TCTGGATTGAACGGATAGGC	AGAGACATCTTCGTTCGCGT
SF3515	C6	55.539	TGCACCACTCCCTGTAATCA	GTCTCTTGCTCAGGTTTGCC
SF17114	C6	56.084	GCAGACACACCTCGATCTCA	CTCAAAAACCCCTAAACGCA
BrSF225-1	C6	58.369	TGAACCAATCAGGCCCTAAG	TTGTTGTTTTGCTAGGCACG
snap0551	C6	63.536	TGGAGCTCCGGAGCGAAGCAG	ATTCCGCTCTCTCCAAATGTGATAAATGGT
BrSF16-225a	C6	63.679	TTCTGTCCAGCTGCAATCAC	AGCATCACTAGCTTCGCCAT
snap2005	C6	69.912	AATTTTAAAACAACACTAAAGATCATAGGCTTGAGG	AATGTATATTAAATTCTCTTTCATGGCACATGGACA
snap1510	C6	76.668	ACAGATGGATAATGAGTTGCATGCATAAG	AAGCGATAGCTTCATTCTCATCCTGAAACC
SF21101	C6	82.471	AAACGCTTCTTTGTTCCAGC	CCGGCGGTAAAATTGACTAA
snap0799	C6	86.756	GGTCATCTCTGTGAGACGGCCACC	ACTCGTATACTCCCAAGTTCAAAATATCTTACCACG
pr44	C6	106.268	TTCGGGACGAGTACTTGG	AATACTGAGCTGGATCTTC
SF36141b	C7	0	GGGGTTTGCAGCAATGTAGT	CGTCGTCCATGTCTAAGCCT
SF13402	C7	12.33	TGCTGATTACCAGCCCTCTT	ACCACCTCCCTGTCAAACAA
BrSF50-45a	C7	25.515	TACCAATGAGCCCTGGAATC	TGCCATGACTGCAAAGAGAC
SF33068	C7	40.618	CATGCTTGCCTGAAAAGACA	CCTTGTACTGCTCCTCTGCC
SF5204	C7	47.045	AAAAAGCGAGGGTGGAAAAT	GAGAAACCCACCACGAAAGA
SF45567	C7	50.868	ATCGCAGATCGCAATTTTCT	AGACCTGACCTGCTGTGACC
snap0601	C7	55.068	GAAACTTGCCTTGAAGGGTTTCAACGA	TCCAGCCTTAATGTGAACTACAAAAGTCGTGT
snap0508	C7	58.978	ACGCTAGTTACTTCCGTGAGCGCG	CCACAAAGCAACGGACTACATCATAGTAGAGG
snap1530	C7	61.777	GATTTCTAAAACCTTCTTGATAATGAGCTTCTGCTA	TCCTAGCAGATTCAAGACAAGTTACTTAGGCACTC
SF13871	C7	62.742	AACGTCGACTCTGTGTGTGG	GTGGGGGAGAATTGTAACGA
BrSF37-10b	C7	66.481	TGGTTGTAGCCACCAAGTCA	GGGCTTGGCATACATGAGAT
BrBAC290b	C7	73.695	TCTGGATTGAACGGATAGGC	AGAGACATCTTCGTTCGCGT
SF19775	C8	0	AGTGGGTGAACCAAGGACAA	AAGCAAGTTTCAGCCAAAGC
SF1518	C8	4.901	AAGGTTCCACCGAGAATTGA	AGGAGGAGACGAGGGAGAAG
BoSF1222	C8	9.622	CACTTGGACTACCGCTGTCA	TAGAAACAACTTGGGACGGC
SF18633	C8	11.418	GCTCAAGAGGAGTCGTCGTC	GCCAACTATCAGCCTTCTCG
SF15734	C8	14.098	TCCATATCCAACAACATTCTGC	AAAAGAAACCCGCACAAAAA
SF18334	C8	48.305	AGCTCACGAATCTGCTCCAT	CCGAAACCAAGATAGGTGGA
BoSF1080	C8	49.35	TCCCACACTAGAGAGAGCGAA	CAAAATTACAACCCCATAACACA
SF11771	C8	50.357	AACGATCTCGGTGGTGGTAG	AGGGACTCAGTGCTTCCTCA
SF53264	C8	50.572	GCCTTATCAGCATGTGGCTT	AGAGGCTTACCATGCTTCCA
BrSF7-174a	C8	52.64	TTGTGAAATCAAAGCAAAAAGG	GAATGAGTGGGTCGTTCGTT
SF3004	C8	57.317	AGGCCAACTTTGGAGGTCTT	GCATGAGTCAGCTTCAGATTCTT
pr05	C8	60.686	TCAAGCGTACGAGACACG	CGGTAGATAAGTCGGCAC
SF21342	C8	61.879	TGACCAATTTTTATTTCCCCC	CTTGGTCTAAGGCATCCGAA
BrSF45-40	C9	7.072	GCACATAATGAAATTGCGGAT	AATGTCCCACACGATCATTTT
BrBAC268	C9	10.176	AATGTCCCACACGATCATTTT	GCACATAATGAAATTGCGGAT
BrBAC054	C9	18.171	TTGGAGCATGGGTTTGAGTT	CTCTCACGCTTCTCTCCACC
SF22798	C9	19.519	CTTCGGTTTCAACCGTCATT	ACAACACTCCCTGCAAAACC
BrBAC256b	C9	20.874	ATCATTGCAACGGTAGCCTC	GCGGGTGTTAGTTTATCCGA
P536b	C9	21.367	GTGAGAGCTTGGATCGAAAA	GCTAGCTCATGAAAGAACCG
BrSF243-2b	C9	23.598	GTGATTGGTTGGCACATGAC	GTGATGGTACGGCTTAGGCT
P514	C9	25.235	CTAAGGCCAAGAAAGGGAAG	TGCTTATGCCCAGATAAAGC
SF7520	C9	26.631	TTGCTTTTGCTTCTGGGTTT	TGTTTGTGTCCGAAATCACG
SF28484	C9	29.001	AACTCCCTGCAAAGGTGAGA	TTGGCGGCAACTAAAAGAAG
SF61499	C9	29.876	TCCATTTCAAGAAGTCGGATCT	CAACACTTGCACCCATTTTG
BrSF95-50	C9	32.036	CCAAAGAAAACAACCAGGTCA	TAAATGGAAAGGCGGACAAA
SF24724	C9	32.746	ACGCGCAAAGAAATTTGAGT	TTGCCATATTGAACAGCCCT
P530b	C9	40.229	TGCACTAAAATAGCTGCAAAGA	GGTTTACAAGACGTCGAAGAAG
BoSF1516	C9	41.5	CAGCTCTTGATTTCGCTTCC	GGGAGTTTTAATGGCGGATT
SF7954	C9	41.647	TAAATTGCGCTGCCCTTAAA	TCATTGACCCTTTTCCGAAC
P534a	C9	42.125	TCGGGATCCTGAACAGTG	ATGCAGCAGAGTAGCGGA
SF2601	C9	47.848	TGTCACGGCATCTACAGACC	GGAAGAGATTGTTGGGTTGAG
SF12883	C9	52.339	TTGTGGAGAGTCCATTGCAG	TGTGTTGATTCTTGATGGGC
BrSF37-10c	C9	60.752	TGGTTGTAGCCACCAAGTCA	GGGCTTGGCATACATGAGAT
BrSF196-3	C9	65.07	TAAAACACCGAAACCCCTCC	CGTGGTCAAAGTGTTGGATG
BrSF11-36	C9	65.681	TTGTTTGAAGTGAGAAAGAAATCAA	TGCTAAGCTAAGAGTGAGCATGA
SF25867	C9	75.658	TCCGTTCCGAAGACAAAATC	GGGTATACGCAAAACGATGG
SF47821	C9	86.919	CGATCTCTGGCGTTCTTAGG	GCTGCAAAATCCCTAATTGC
SF7315	C9	135.853	GCCGTTTCTCTTCTCACCTG	CAAAGCCAGTCGAACCTCTC
a Marker indicates newly developed genome-sourced marker.
b Chromosome upon which newly developed genome-sourced marker was located.
c Position on chromosome of the newly developed genome-sourced marker.
