# Supplementary material for: Design of New Genome- and Gene-Sourced Primers and Identification of QTL for Seed Oil Content in a Specially High-Oil Brassica napus Cultivar
Source: PLoS One. 2012 Oct 12;7(10):e47037. doi: 10.1371/journal.pone.0047037 (PMC3470593; doi:10.1371/journal.pone.0047037)
Supplement: Table S3 — Details for 48 newly developed markers related to oil-content genes in DH genetic linkage map. (XLS) [file pone.0047037.s003.xls]

## Sheet: Table S3
Table S3. Details for 48 newly developed markers related to oil-content genes in DH genetic linkage map.
Gene markera	Type	Gene	Locationb	Chromosomeg	Positionh	Forward primer	Reverse primer
GIFLP057	IFLP	BnG37	1/2exonc	A1	22.104	CTCATCTTCTCATTACCCGTCT	CAGCCACAGTCTCATCTACCT
GSSR134	SSR	BnG24	outside-Bd	A1	63.274	GGGCAACAATAATGGTTCTGA	ATTGGTGGTGAATTTGGCTC
GTFzip52	InDel	BnG50	1exone	A1	134.275	CTCCTGGAGGATTAGGCTT	GAGAGGTTGCTGCAACAGT
GSNP39	SNP	BnG44	3/4exon	A2	26.279	ATGGAGCTAACGTCGATGGA	GACCACTCCTCCTCGTTGT
GSSR161	SSR	BnG30	outside-B	A2	138.252	TGTCGCTTATCGCCTGAATA	CTGGAGAAGCTCTGGGAATG
GSSR143	SSR	BnG26	F-outsidef	A3	18.372	TCCCTCGTCGTCCTTTTCTA	GTAGGAGGAGGAGGATTGGC
GTFzip08	InDel	BnG48	1exon	A3	67.895	CCTCCACAAGATCAGACTCC	GCCGATCTCTCCGACCTC
GSSR082	SSR	BnG16	F-outside	A4	26.158	TTTGGAGCCGGTTCAATTAG	CCGCTGGTAGTTTGTTGGTT
GSSR083	SSR	BnG17	F-outside	A4	28.862	CATGGGTGGTCAATGTCTTG	ATCCCGAACCCACGTTTTAG
GSSR072	SSR	BnG15	F-outside	A4	52.654	CCTAAGGGTCTCCCGATCTC	TTCGAATCACGGTCTCTTCC
GIFLP034	IFLP	BnG35	5/6exon	A5	31.933	GGCCAAAACTTTTGTGGAAC	GTGTAAATGTCACCGAAACCC
GSSR035	SSR	BnG07	F-outside	A5	68.223	GCCGAGAAGAAGACAAACGA	TCCTTCAACCATGGCTTCTC
GTFzip47b	InDel	BnG49	2exon	A5	100.637	TTCAACGCTTTATCTCCGAT	GGAAGAAGATACATCGAAAC
GIFLP106	IFLP	BnG40	3/4exon	A5	106.053	ATCGAGGAGAACTGGGACAA	ACAAGAGGTGCACATATCTCA
GSNP40	SNP	BnG45	2/3exon	A6	60.844	GCTATCAAGGCTTTGTTCC	CACGTAAGGTCCTTCCTC
GSNP38	SNP	BnG43	1exon	A7	4.467	GTGGCTTGGGCGACGGA	CGACGCTAGCCTATTCCTTC
GSSR031	SSR	BnG04	F-outside	A7	18.355	AAATGCTCTCTCTCCCGCTT	TGGAGGAGAGATAGAGGGGG
GSSR034	SSR	BnG06	F-outside	A7	30.528	GAATAAGTAGCTTCGCCGGA	AACCTCTCCGCCTTCTTCTC
GSSR032	SSR	BnG05	F-outside	A7	36.7	TAGGAGCAGTTGGTTCAGCA	TAAGCGAAAAGCCACAACCT
GSSR128	SSR	BnG23	F-outside	A8	0	TTTTTCGTTGAGAGTTATTTTGTGA	TTTACAATTTTGCCCCAAGC
GSSR052	SSR	BnG11	F-outside	A9	39.534	TTTGTACGTTTGGCTGCTCA	TCCCAAGATGATGATGATGAA
GSSR051	SSR	BnG10	outside-B	A9	44.892	CTGGTGTCCCAACTGTTGAA	AGCAGGAACAGCTCGAACAT
GSSR057	SSR	BnG13	outside-B	A9	46.099	CCACATCATACGGTGTCCAA	AGCCAATCTCGACAACAACC
GSSR054	SSR	BnG12	outside-B	A9	47.14	TGTTACGAGTTGATTGCCAGA	AAGACCAGACAAGTGCCAGC
GSSR044	SSR	BnG09	outside-B	A9	51.556	CTGGTGTCCCAACTGTTGAA	AGCAGGAACAGCTCGAACAT
GSSR060	SSR	BnG14	outside-B	A9	53.288	TGAAAGGTGAATGGTGAGCA	AAAGTGGGATGAAGAAGCCA
GSSR148	SSR	BnG28	outside-B	A10	30.897	GAATCTCTTGTATGGCCCGA	CCAAAGATTGAGCGAGAAGC
GSSR147	SSR	BnG27	outside-B	A10	32.005	GGGAGGTGTGATGCCTAAAA	AGGAGTTTCAGCTGGGGATT
Gindel049	InDel	BnG47	1/2exon	A10	36.748	GGGTGGAGCAAATCCTTCC	GGCTTGGCTCTTGAATGGTT
GIFLP107	IFLP	BnG41	9/10exon	C1	75.442	TGGTTGTACTTGGAGAGCTTG	GCTTGTGCAGACTCCATCTC
GSSR169	SSR	BnG31	outside-B	C2	85.502	TCTTTTTCACGCTCCTGTCC	TTGTCAGGTTCGTTCCAAGA
GSSR113	SSR	BnG22	outside-B	C4	43.936	TGGATTAGCCAAAAATACGGA	CGGTGAATGTGACTTGAAGC
GSSR085	SSR	BnG18	F-outside	C4	49.4	TGCTTCAAGATTCCTGGTCC	TATTGTGGTCCCCTTTCACG
GSSR086	SSR	BnG19	F-outside	C4	50.621	CCGTCTCCATTTCGAGATTC	TAGTGCGTCTTTCCCGAAGT
GSSR089	SSR	BnG20	F-outside	C4	51.827	TCCGGCAAGTAAGCAGTTG	ACGGCGGTTCTTCTTAATCA
GSSR012	SSR	BnG03	F-outside	C4	56.778	TCCTTTGGAGAGGGTTTGTG	TGTCCACGCTACTATGACCG
GSSR011	SSR	BnG02	outside-B	C4	58.333	CCGATCCGATCCGTACATAA	TCCAGACGATAACGCAGACA
GSSR090	SSR	BnG21	F-outside	C4	74.37	GGGGCAACAGTGGATTTAGA	CATCGCTCGTATGTCCCTTT
GSSR002	SSR	BnG01	F-outside	C5	5.411	CGCATTCTATTTTTCTCATGAAACT	TTCGGGGTCCTATTCAAAAA
GSSR037	SSR	BnG08	F-outside	C5	31.151	TGGGTAAGCCAAATCAACATT	GAGACCAAATCGAAACGAGC
Gindel042	InDel	BnG46	1exon	C5	42.472	ACTGTCGACATGTCGAATCC	CGCTGTATGACTTGTCGATG
GTFzip47a	InDel	BnG49	2exon	C5	78.847	TTCAACGCTTTATCTCCGAT	GGAAGAAGATACATCGAAAC
GIFLP100	IFLP	BnG39	1/2exon	C5	80.296	AGCTCCGGACCTCAATTT	GATGGCTCACGAGTATCTGC
GSSR141	SSR	BnG25	F-outside	C5	87.567	GAAAAGTGCCTCCATGGGTA	ATGCCATACTTGCAGGAGGA
GIFLP021	IFLP	BnG34	1/2exon	C8	6.955	AGACCGCCTTCTCCCAATAC	GATGGCATCCTTCATCGACTT
GIFLP046	IFLP	BnG36	2/3exon	C9	32.537	ACCTAGAGTATAACAACCCCAAAAC	CTCCTCCAAGATCATCACAAGC
GSSR173	SSR	BnG32	F-outside	C9	77.117	CAGTGGTAGCTTTGATTTGGG	TTCTTTGAAACAGAACCGGG
GSSR150	SSR	BnG29	F-outside	C9	83.864	TGACGCTATTATTCCCCAGG	TCCTTCCGCTACAAGTTTGG
a Gene marker indicates newly developed marker related to oil-content gene.
b Location of gene marker in the differentially expressed gene.
c Gene marker located in the first and second exons of differentially expressed gene.
d Gene marker located in the differentially expressed gene's flanking sequence which was in the back of initiation codon ATG.
e Gene marker located in the first exon of differentially expressed gene.
f Gene marker located in the differentially expressed gene's flanking sequence which was in the front of initiation codon ATG.
g Chromosome upon which newly developed marker related to oil-content gene was located.
h Position on chromosome of the newly developed marker related to oil-content gene.
