# Supplementary material for: Design of New Genome- and Gene-Sourced Primers and Identification of QTL for Seed Oil Content in a Specially High-Oil Brassica napus Cultivar
Source: PLoS One. 2012 Oct 12;7(10):e47037. doi: 10.1371/journal.pone.0047037 (PMC3470593; doi:10.1371/journal.pone.0047037)
Supplement: Table S4 — Details for correlations between linked markers in the QTL and the seed oil content. (XLS) [file pone.0047037.s004.xls]

## Sheet: Table S4
Table S4. Details for correlations between linked markers in the QTL and the seed oil content.
QTLa	QTL region	Marker	Chromosomeb	Positionc	P valued	Number of genotype		Pχ2 e	Mean±SE(Oil content %)			Forward primer	Reverse primer
	(cM)					AA(zy036)	BB(51070)	(1:1)	AA(zy036)	BB(51070)	P value(TTest)f
		BnGMS0936	A2	136.636	0.028*	41	49	0.399075	43.25±3.06	38.31±2.84	8.37616e-07	TGGCTCATTTGATAGGTTCCA	ATCCCAACTCAAGATCCTGCT
		BrSF34-118	A2	137.731	0.003**	24	67	6.55574e-06	43.26±2.83	38.36±2.82	1.20825e-06	CAGGACAACTATCTAAGGTTTGTTCA	TGTCCAGCGCTTAGACTCAA
		BoSF0970	A2	138.175	0***	46	45	0.916512	43.09±3.05	38.17±2.85	4.55626e-07	GCCAGAGTAAATCTCGTCGC	CCTAGAAGCATCTTCACGGC
OW-A2	136.6-141.6	GSSR161	A2	138.252	0****	44	44	1	43.18±3.04	38.33±2.82	7.79074e-07	TGTCGCTTATCGCCTGAATA	CTGGAGAAGCTCTGGGAATG
		BrGMS0209a	A2	139.262	0****	60	31	0.00236558	43.14±3.12	38.30±2.83	1.6774e-06	CTTGTTGTCACTTTAGAACCACTTG	GTTTCATCTCCAGGTTACAGGAT
		P597	A2	139.9	0****	43	46	0.750485	42.22±2.56	38.70±3.23	0.00010343	CGACAGAGGGTTCAAATGGT	CGGTGTGTAGGTCTGCTCAA
		BrSF34-123	A2	140.561	0***	48	43	0.600179	43.17±3.21	38.44±2.86	6.65712e-06	CCCCTGCAATTTGTAACCAC	CCCTTTTGAACAAGGTACGC
OW-A3	21.8-24.9	BrSF166-9	A3	22.028	0.002**	40	48	0.393769	43.45±3.76	38.78±2.85	0.000436141	TGACATTCGCATCAGATTTGT	TTCCTCCATCGTCTTTGTCC
OW-A5	104.4-108.6	GIFLP106	A5	106.053	0.033*	41	49	0.399075	42.48±3.19	38.46±2.98	9.16414e-05	ATCGAGGAGAACTGGGACAA	ACAAGAGGTGCACATATCTCA
		BoGMS1025	A6	47.2	0.014*	50	42	0.404248	41.16±2.93	39.20±3.51	0.0899776	TGAAACCCTAATCGTTGACT	ACTACTTGTGAATCGTCGTTG
OW-A6	46.3-50.4	Ol11F12	A6	47.7	0***	30	60	0.0015654	41.69±2.62	39.24±3.55	0.0721864	ACTGCTCTTGTTGCTGATGC	ACTCAGCGGGACCATAATTG
		SF17359	A6	48.3	0.023*	38	51	0.168204	41.68±3.15	39.12±3.43	0.044208	TTAGAGGCATAGGGGACGTG	ACGTTTGGAACACGTGTGAA
OW-C5	72.4-76.2	snap1200	C5	73.78	0***	43	48	0.600179	43.05±3.65	38.65±2.96	0.000367789	TTAACCTTTGTGGCAGATAAACAAACTGAGATAAT	TTATCACTCTCTGTGTATCCAGTGTGTGAGTGC
OW-C9	74.9-76.9	SF25867	C9	75.658	0.016*	44	48	0.676657	42.52±3.59	39.15±3.40	0.071542	TCCGTTCCGAAGACAAAATC	GGGTATACGCAAAACGATGG
		FITO255	A2	23.937	0.033*	45	47	0.834827	45.87±2.34	44.15±2.96	0.000385634	GACAAGCAATCCATCACC	TTTACGGAGAAGTTACAGAA
		GSNP39	A2	26.279	0.013*	38	49	0.238269	45.85±2.34	44.00±3.01	0.000318261	ATGGAGCTAACGTCGATGGA	GACCACTCCTCCTCGTTGT
OY-A2	20.8-37.5	BrSF36-68	A2	27.749	0.031*	40	51	0.248864	45.81±2.66	44.36±2.87	0.00294996	CCAAACTGGACGTGATCAGA	GCTCCCATCGTTTCATCTTC
		BrSF36-16	A2	28.608	0.042*	45	47	0.834827	45.07±2.40	44.61±3.02	0.00272202	TGCTAATGCTCCCGTATTCA	CGGTTTTCCTCTCTTCTCGTC
		BrSF36-9	A2	31.467	0.038*	34	57	0.0159064	45.35±2.41	44.44±3.02	0.134706	TGGTAAACAAATCATGCAATCA	CGTATGAGTAGCAAGTGTCAACAA
OY-A3	27.6-29.5	BrSF345-6b	A3	28.381	0.025*	43	48	0.600179	45.80±3.06	44.88±2.69	0.325202	TCTTCCCGCCTCTGAGTAAA	CGGAGTTCCAAAGACCTTCA
		SF967a	A3	28.938	0***	31	60	0.00236558	47.56±2.54	44.63±2.58	0.00217268	TGGAAATAGGCATATTACATTGG	GAAGAGCAGGAAGTTTTGGC
OY-C8	0-4.5	SF19775	C8	0	0.002**	41	50	0.345448	47.79±2.59	44.74±2.64	0.0122731	AGTGGGTGAACCAAGGACAA	AAGCAAGTTTCAGCCAAAGC
		SF28484	C9	29.001	0.023*	59	32	0.00464943	45.37±2.59	44.39±2.98	0.125684	AACTCCCTGCAAAGGTGAGA	TTGGCGGCAACTAAAAGAAG
		SF61499	C9	29.876	0.008**	58	33	0.00877463	45.49±2.52	44.26±3.00	0.0514741	TCCATTTCAAGAAGTCGGATCT	CAACACTTGCACCCATTTTG
OY-C9	27.1-33.1	BrSF95-50	C9	32.036	0.009**	61	31	0.0017617	45.41±2.73	44.01±2.94	0.0419273	CCAAAGAAAACAACCAGGTCA	TAAATGGAAAGGCGGACAAA
		GIFLP046	C9	32.537	0.002**	40	52	0.210903	45.59±2.61	43.88±2.71	0.00542419	ACCTAGAGTATAACAACCCCAAAAC	CTCCTCCAAGATCATCACAAGC
		SF24724	C9	32.746	0.002**	37	55	0.0605689	45.39±2.66	44.46±2.83	0.119491	ACGCGCAAAGAAATTTGAGT	TTGCCATATTGAACAGCCCT
		GSSR161	A2	138.252	0.021*	44	44	1	46.77±3.92	44.53±3.51	0.0803077	TGTCGCTTATCGCCTGAATA	CTGGAGAAGCTCTGGGAATG
		BrGMS0209a	A2	139.262	0.034*	60	31	0.00236558	47.15±3.99	44.33±3.16	0.00105731	CTTGTTGTCACTTTAGAACCACTTG	GTTTCATCTCCAGGTTACAGGAT
OQ-A2	138.3-143.5	P597	A2	139.9	0.004**	43	46	0.750485	47.24±3.72	44.37±3.31	0.000832459	CGACAGAGGGTTCAAATGGT	CGGTGTGTAGGTCTGCTCAA
		BrSF34-123	A2	140.561	0.003**	48	43	0.600179	47.71±3.91	44.32±3.15	0.000128363	CCCCTGCAATTTGTAACCAC	CCCTTTTGAACAAGGTACGC
		BrBAC292	A2	141.865	0.022*	50	42	0.404248	47.53±3.98	44.56±3.20	0.00125589	TGAAAAAGAAGAAGAAAACATCACA	TAGTCAAGGGGTGGATCGAG
		BrSF50-45b	A6	52.6	0.03*	21	71	1.85951e-07	45.89±3.68	44.84±3.27	0.511241	TACCAATGAGCCCTGGAATC	TGCCATGACTGCAAAGAGAC
OQ-A6	52.3-57.1	niab041	A6	52.8	0.024*	32	60	0.00350929	45.81±3.94	44.83±3.23	0.505117	TCTCTCACCGGATTGGACTC	GTTTGGTTCCGGGTATCCAT
		BrSF50-42	A6	52.8	0.014*	30	59	0.00211214	45.49±3.86	44.86±3.26	0.687743	GGGCAGGCTAACCCCTAGTA	GAAGACGACGACATCGGTTTA
		Na14H11	C2	77.225	0.005**	64	26	6.18729e-05	47.22±3.89	44.43±3.17	0.00129508	GGATGTTTTCACAGACCCTG	CTTTGCAGGTATGAACACGC
OQ-C2	70.9-85	sN3761	C2	78.246	0.008**	45	47	0.834827	47.18±3.81	44.48±3.14	0.00139065	CGACAGAGGGTTCAAATGGT	CGGTGTGTAGGTCTGCTCAA
		SF967b	C2	80.079	0.011*	31	59	0.00316276	47.12±3.86	44.49±3.12	0.0102715	TGGAAATAGGCATATTACATTGG	GAAGAGCAGGAAGTTTTGGC
		BrSF95-50	C9	32.036	0.026*	61	31	0.0017617	47.08±4.12	44.19±3.28	0.00860656	CCAAAGAAAACAACCAGGTCA	TAAATGGAAAGGCGGACAAA
OQ-C9	30.2-33.5	GIFLP046	C9	32.537	0.004**	40	52	0.210903	46.87±3.94	44.07±3.24	0.0189249	ACCTAGAGTATAACAACCCCAAAAC	CTCCTCCAAGATCATCACAAGC
		SF24724	C9	32.746	0.045*	37	55	0.0605689	46.66±4.05	44.21±3.26	0.0547685	ACGCGCAAAGAAATTTGAGT	TTGCCATATTGAACAGCCCT
a QTL related to seed oil content were named according to trials and corresponding linkage group number.
b Chromosome upon which linked marker in the QTL was located.
c Position on chromosome of linked markers in the QTL.
d P value indicates the correlation between linked marker in the QTL and the seed oil content using the method of single marker analysis: * P<0.05; ** P<0.01; *** P<0.001; **** P<0.0001.
e Pχ2 indicates the analysis of marker in AA(zy036) genotype or BB(51070) genotype using the chi-square test: P<0.01, the marker shows significant distortion of segregation.
f P value(TTest) indicates the significance level in the mean seed oil content (± SE) between AA (zy036) genotype and BB (51070) genotype for every linked markers in the QTL using the T-test: P<0.05, significant difference; P<0.01, extremely significant difference.
